# Supplementary material for: Adverse drug events and associated factors in hospitalized pediatric patients using a Trigger Tool at Tirunesh Beijing Hospital, Ethiopia
Source: Research Square preprint supplement (doi:10.21203/rs.3.rs-5520387/v1), 2025-04-17
Supplement: Supplementary file 1 [file 1d0ab87c51d0283ad7a2323e.docx]

**Supplementary Material 1: List of Known ADE Triggers Used in the Study**

The following table lists the known Adverse Drug Event (ADE) triggers used in this study, adapted from the Global Trigger Tool (GTT-IHI) and modified to suit the pediatric population and local context. These triggers were used to screen medical records for potential ADEs:

| **Trigger** | **Description** |
| --- | --- |
| **Abrupt medication stop** | Discontinuation of a medication without a clear clinical reason. |
| **Use of antidotes** | Administration of medications such as naloxone, flumazenil, or vitamin K. |
| **Rash or allergic reaction** | Documentation of rash, hives, or other allergic reactions. |
| **Diarrhea** | New-onset or worsening diarrhea during hospitalization. |
| **Vomiting** | New-onset or worsening vomiting during hospitalization. |
| **Elevated serum creatinine** | A significant increase in serum creatinine levels indicating potential nephrotoxicity. |
| **Hypoglycemia** | Documentation of low blood glucose levels. |
| **Hyperglycemia** | Documentation of high blood glucose levels. |
| **Abnormal liver function tests** | Elevated liver enzymes (e.g., ALT, AST) indicating potential hepatotoxicity. |
| **Neutropenia** | Documentation of abnormally low neutrophil counts. |
| **Thrombocytopenia** | Documentation of abnormally low platelet counts. |
| **Use of diphenhydramine or antihistamines** | Administration of medications to treat allergic reactions or side effects. |
| **Unexpected transfer to a higher level of care** | Transfer to the ICU or another specialized unit due to a suspected ADE. |
| **Readmission within 30 days** | Hospital readmission within 30 days of discharge with a suspected ADE-related diagnosis. |
| **Documentation of medication error** | Any documented error in prescribing, dispensing, or administering medications. |
